# Supplementary material for: Timing of ripening initiation in grape berries and its relationship to seed content and pericarp auxin levels
Source: PubMed Central journal article supplement (PMC4340107; doi:10.1186/s12870-015-0440-6), 2015-02-12
Supplement: 12870_2015_440_MOESM2_ESM.pdf [file 12870_2015_440_MOESM2_ESM.pdf]

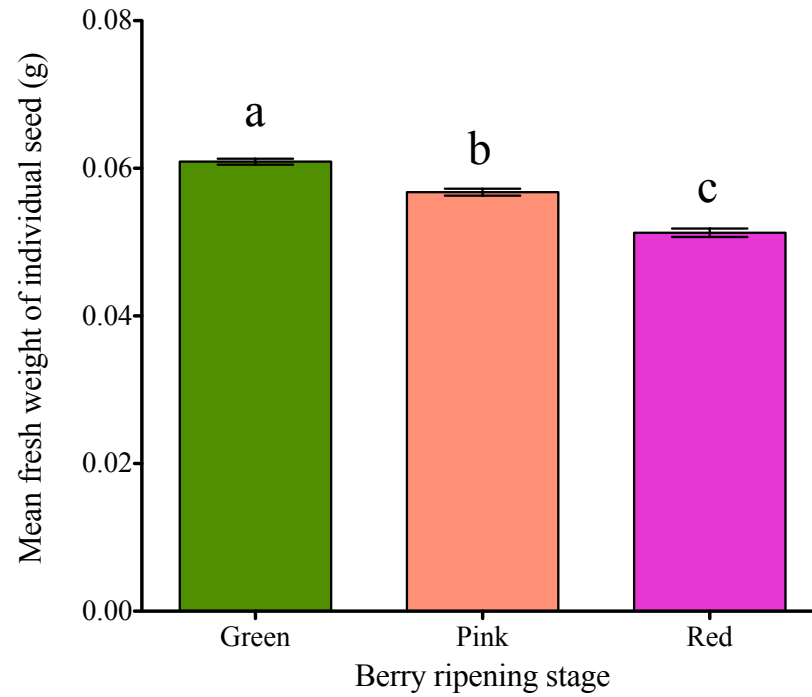

**Additional file 2: Individual seed weight in green, pink and red berries of véraison cluster.** The mean calculation per ripening class is based on more than 300 individual berries. Error bars indicate  $\pm$  SEM. Different letters denote significant difference (Tukey's HSD test,  $p < 0.05$ ).
