# Supplementary material for: Timing of ripening initiation in grape berries and its relationship to seed content and pericarp auxin levels
Source: PubMed Central journal article supplement (PMC4340107; doi:10.1186/s12870-015-0440-6), 2015-02-12
Supplement: 12870_2015_440_MOESM6_ESM.pdf [file 12870_2015_440_MOESM6_ESM.pdf]

**Additional file 6: Vitis gene IDs and sequences of the primers used in the qRT-PCR experiment.**

Auxin response factor 4; *ARF4* (VIT\_06s0004g03130)  
F: GCTTGGAAGAAGCTCCAGTG  
R: GCATACCAACAAGGCAAACA

Auxin response factor 6; *ARF6* (VIT\_03s0167g00010)  
F: AGCAAAAGGATGCGTACCTC  
R: GAGGAACAGAGAAGCCTCCA

Auxin response factor 7; *ARF7* (VIT\_13s0019g00110)  
F: CACCATGGCAAGAATTGGTT  
R: GCATCGCCAATTGCTAATCT

Auxin response factor 8; *ARF8* (VIT\_04s0079g00160)  
F: TTGGTGAGAGGAGGATTTGG  
R: CCCAACCCCTGATGTTGAAAG

Auxin/indole-3-acetic acid inducible protein 9; *Aux/IAA9* (VIT\_13s0019g04380)  
F: GCTAACAATTCTGGCCGATTC  
R: TCACTCCCAAAGCCAAAAC

9-cis-epoxycarotenoid dioxygenase; *NCED4* (VIT\_02s0087g00930.t01)  
F: CTTGATATTGTGGCCGCTGT  
R: AATTCGAGCTTGCTTTCCAA

MYB transcription factor; *MYBA1* (VIT\_02s0033g00410.t01)  
F: GAGGTGAGGGTGATTTTCCA  
R: AATGCAAGAACAACCTTTTGAAC

TAR3; *TAR3* (VIT\_218s0157g00090)  
F: TGCTGCTGCACCAAATAAAA  
R: TGAGCTTATGATCAACTGATTGTT

Gretchen Hagen3; *GH3-2* (VIT\_207s0129g00660)  
F: TCGATTCCAGAGTCCTCTCC  
R: CGACAGATTGCCCTTTTGTT

Gretchen Hagen3; *GH3-1* (VIT\_203s0091g00310.1 )  
F: TCCTCGACTCCAGAGTGGTC

R: AGTGGAACGGCCACTATTTG

YUCCA; *YUC1* (VIT\_207s0104g01250)

F: AGGCTTGACTGGAGCTCGT

R: CCAAATTTTCTCATCCAAATCC

YUCCA; *YUC2* (VIT\_207s0104g01260)

F: ATTTGAGGGTGGCAAATCAC

R: GGAAGTCCATCCTCGTTCAA

peptidyl-prolyl cis-trans isomerase (Endogenous control) (VIT\_06s0004g06610)

F: TCCACTCTTGCCTTTTGTGCT

R: ACGGATCAAAGCCATTTCTG
